# Supplementary material for: High-Molecular-Weight Exopolysaccharides Production from Tuber brochii Cultivated by Submerged Fermentation
Source: MDPI journal article supplement (doi:10.3390/ijms24054875), 2023-03-02

**Table S1.** Effect of different yeast extract concentrations on mycelia growth and polysaccharides production from *T. borchii*.

| Yeast extract concentration (g/L) | Dry cell weight (g/L) | EPS (mg/L)   | IPS (mg/L)    |
|-----------------------------------|-----------------------|--------------|---------------|
| 10                                | 3.41±0.04             | 498.74±13.24 | 929.44±12.36  |
| 15                                | 3.54±0.21             | 603.6±28.14  | 1064.75±96    |
| 20                                | 4.06±0.11             | 725.2±30.17  | 1385.7±41.03  |
| 25                                | 1.65±0.29             | 776.09±29.72 | 667.39±34.38  |
| 30                                | 1.27±0.22             | 905.61±4.85  | 411.07±103.05 |

**Table S2.** Strain Identification Report

|                               |                                                                                                                                                                     |                                 |            |
|-------------------------------|---------------------------------------------------------------------------------------------------------------------------------------------------------------------|---------------------------------|------------|
| <b>Committee Support Unit</b> | Middle Institute of Chemical Engineering, Hsingh University                                                                                                         | <b>Receive Inspection Date</b>  | 2021/04/20 |
| <b>Committee Trustee</b>      | Liu Yong Quan                                                                                                                                                       | <b>Report Announcement date</b> | 2021/05/03 |
| <b>Check body type</b>        | <input checked="" type="checkbox"/> Tray <input type="checkbox"/> Bacteria <input type="checkbox"/> Bacteria powder <input type="checkbox"/> Other, please specify: |                                 |            |
| <b>Check test items</b>       | <input type="checkbox"/> Identification of bacterial strains <input checked="" type="checkbox"/> Identification of fungal strains                                   |                                 |            |
| <b>Check body name</b>        | <i>Tuber borchii</i> (ATCC-MYA-1019)                                                                                                                                |                                 |            |
| <b>Remark</b>                 |                                                                                                                                                                     |                                 |            |

**Detection process description:**

DNA extraction → Target PCR → Sequential decoding → Sequence Alignment → Evolutionary tree → Report

**DNA Extraction:** Taco automatic nucleic acid extractor (magnetic bead system) was used to extract and purify the DNA of bacteria or fungi. For detailed procedures, please refer to Total User Manual for DNA Extraction Kit (product code: atci-dna).

**Target PCR-1:** 16S rDNA is used as the target gene for bacterial identification. Considering that the diversity of bacterial species makes PCR difficult to amplify, three different sets of Universal Primers were used for 16S rDNA PCR amplification, and the PCR products that were successfully amplified and longer in length were sequenced and decoded. The PCR product sizes of these three sets of primers are listed in the table below:

| Numbering | Primer name      | PCR product (bp) | References                                                                                                                                                                              |
|-----------|------------------|------------------|-----------------------------------------------------------------------------------------------------------------------------------------------------------------------------------------|
| 01        | 27F/1525R        | 1500             | Lane, DJ 1991. 16S/23S rRNA sequencing. In: Nucleic acid techniques in bacterial systematics. Stackebrandt, E., and Goodfellow, M.,eds., John Wiley and Sons, New York, NY, pp. 115-175 |
| 02        | 8F2/806R         | 802              | N Engl J Med 1992;327:293-301                                                                                                                                                           |
| 03        | fD1modF/16S1RR-B | 568              | J Clin Microbiol 1998;36:2205-9.<br>Arthritis Rheum 1998;41:535-43.                                                                                                                     |

**Target PCR-2:** Fungal identification uses NS (18S) or ITS (18S/28S) as the target gene. Considering that the diversity of fungal species makes PCR difficult to amplify, 3 different sets of Universal Primers were used for NS or ITS PCR amplification, and the PCR products that were successfully amplified and longer in length were sequenced and decoded. The PCR product sizes of these three sets of primers are listed in the table below:

| Numbering | Primer name | PCR product (bp) | References                                                                                                                                                                                     |
|-----------|-------------|------------------|------------------------------------------------------------------------------------------------------------------------------------------------------------------------------------------------|
| 01        | NS1/NS6     | 1400             | White TJ, T. Bruns, S. Lee and J. Taylor, in PCR Protocols: A Guide To Methods And Applications, ed. MA Innis, DH Gelfand, JJ Sninsky, TJ White, Academic Press, San Diego, 1990, pp. 315–322. |
| 02        | NS5/NS6     | 310              |                                                                                                                                                                                                |
| 03        | ITS1/ITS4   | 570/590          |                                                                                                                                                                                                |

**PCR conditions and reaction temperature:**

| Reaction mixture                  |             | Reaction time                                                                               | Instrument                                                    |
|-----------------------------------|-------------|---------------------------------------------------------------------------------------------|---------------------------------------------------------------|
| Reaction components               | Volume (μL) | 95 °C- 5 min<br><br>95 °C- 30 sec<br>60 °C- 30 sec<br>72 °C- 30 sec<br>72 °C- 7 min<br>Stop | Veriti 96 Well Thermal Cycler<br><br>Serial Number:#299025707 |
| • Ultrapure water                 | 8.4         |                                                                                             |                                                               |
| • 2.5mM dNTP                      | 3.2         |                                                                                             |                                                               |
| • 10X reaction buffer             | 2           |                                                                                             |                                                               |
| • 25mM MgCl <sub>2</sub>          | 1.2         |                                                                                             |                                                               |
| • 100% DMSO                       | 1           |                                                                                             |                                                               |
| • SuperTherm Taq Polymerase 1U/μL | 0.2         |                                                                                             |                                                               |
| • 2μM F+R primers                 | 2           |                                                                                             |                                                               |
| • DNA template                    | 2           |                                                                                             |                                                               |
| • Total                           | 20          |                                                                                             |                                                               |

**Test result:****Nucleic acid sequencing results: Tuberaceae (taxid:40289)**

TTGCTATCGTCCYTYTGCCCTATCGGACTCCCAAGCAAAACACATTCCTGTG  
TACTCTCCCTCATTAAACTTTTGAACCAATTAGTAGTCTGAGAAGGC  
CATGTGCCGTAAAATTTAAACATGTTAAAACCTTTCAACAACGGATCTCTTGG  
CTCTCGCATCGATGAAGAACGCAGCGAAATGCGATAAGTAATGTGAA  
TTGCAGAATTCAGTGAATCATCGAATCTTTGAACGCACATTGCGCCCTTTGG  
TATTCCTTAGGGCATGCCTGTTCGAGCGTCACTAAAAACCCCTCAC  
AGATAATGTGGTATTGGTAGAAGTGGATGGTACTAACACTACTTTGTCTGAC  
TCTACTGAAATGAATAGGCCAGAGAAGTTGACCGTGGTAATAGACTC  
CAGGAGTGTTTTTAAAATGCTAAATTAGTCTTCTCCAAGTCATGTTCTGAGC  
TACCGGACCCCCCATTTAGTCCAAACTAGAGAGGTTGACCTCGGATCAGGT  
AGGGATACCCGCTGAAAGCGATAGAATCA

**NuclearAcid sequence alignment results:**

Sequence column comparisons takes into account 5 parameters, as described below

**Max Score:** The highest alignment score from that database sequence

**Total Score:** The total alignment scores from all alignment segments

**Query Cover:** Query covered by alignment to the database sequence

**E value:** The best (lowest) expect value of all alignments from that database sequence

**Identify:** The highest percent identity (Max ident of all query-subject alignments)

Both Max Score and Total Score values indicate the homology of the two sequences, and the higher the value, the greater the degree of similarity between them.

E value value is used to evaluate Max Score and Total Score numbers value reliability. It means that in a random situation, the similarity between other sequences and the target sequence is greater than Max Score and Total Score numbers possibility of value. Therefore, the lower the value of E value, the higher the reliability.

**Knot Conclusion:** The results of NCBI Blast comparison show that the sample has the highest similarity with the following strains:

1. ***Tuber* sp. MS11 18S ribosomal RNA gene, partial sequence; internal transcribed spacer 1, 5.8S ribosomal RNA gene, and internal transcribed spacer 2, complete sequence; and 28S ribosomal RNA gene, partial sequence** Sequence ID: [KF850621.1](#)

|                                     | Description                                                                                                                                                                                                                                          | Max Score | Total Score | Query Cover | E value | Per. Ident | Accession                  |
|-------------------------------------|------------------------------------------------------------------------------------------------------------------------------------------------------------------------------------------------------------------------------------------------------|-----------|-------------|-------------|---------|------------|----------------------------|
| <input checked="" type="checkbox"/> | <a href="#">Tuber sp. MS11 18S ribosomal RNA gene, partial sequence; internal transcribed spacer 1, 5.8S ribosomal RNA gene, and internal transcribed spacer 2, complete sequence; and 28S ribosomal RNA gene, partial sequence</a>                  | 970       | 970         | 97%         | 0.0     | 100.00%    | <a href="#">KF850621.1</a> |
| <input type="checkbox"/>            | <a href="#">Tuber borchii 17S ribosomal RNA, partial sequence; internal transcribed spacer 1, 5.8S ribosomal RNA, and internal transcribed spacer 2, complete sequence; and 25S ribosomal RNA, partial sequence</a>                                  | 968       | 968         | 97%         | 0.0     | 100.00%    | <a href="#">AF250291.1</a> |
| <input type="checkbox"/>            | <a href="#">Tuber borchii isolate GB62 18S ribosomal RNA gene, partial sequence; internal transcribed spacer 1, 5.8S ribosomal RNA gene, and internal transcribed spacer 2, complete sequence; and 28S ribosomal RNA gene, partial sequence</a>      | 966       | 966         | 97%         | 0.0     | 99.81%     | <a href="#">HM485342.1</a> |
| <input type="checkbox"/>            | <a href="#">Tuber borchii voucher GB32 collection-date 05-Feb-2007 internal transcribed spacer 1, partial sequence; 5.8S ribosomal RNA gene and internal transcribed spacer 2, complete sequence; and 28S ribosomal RNA gene, partial sequence</a>   | 965       | 965         | 97%         | 0.0     | 99.81%     | <a href="#">FJ809852.1</a> |
| <input type="checkbox"/>            | <a href="#">Tuber borchii strain IG2 internal transcribed spacer 1, partial sequence; 5.8S ribosomal RNA gene and internal transcribed spacer 2, complete sequence; and 28S ribosomal RNA gene, partial sequence</a>                                 | 963       | 963         | 97%         | 0.0     | 99.81%     | <a href="#">KF414978.1</a> |
| <input type="checkbox"/>            | <a href="#">Tuber borchii isolate GB39 internal transcribed spacer 1, partial sequence; 5.8S ribosomal RNA gene and internal transcribed spacer 2, complete sequence; and 28S ribosomal RNA gene, partial sequence</a>                               | 959       | 959         | 97%         | 0.0     | 99.62%     | <a href="#">HM485343.1</a> |
| <input type="checkbox"/>            | <a href="#">Tuber borchii voucher Tar202 internal transcribed spacer 1, partial sequence; 5.8S ribosomal RNA gene and internal transcribed spacer 2, complete sequence; and 28S ribosomal RNA gene, partial sequence</a>                             | 953       | 953         | 95%         | 0.0     | 100.00%    | <a href="#">KT165341.1</a> |
| <input type="checkbox"/>            | <a href="#">Tuber borchii voucher Tar147 18S ribosomal RNA gene, partial sequence; internal transcribed spacer 1, 5.8S ribosomal RNA gene, and internal transcribed spacer 2, complete sequence; and 28S ribosomal RNA gene, partial sequence</a>    | 953       | 953         | 95%         | 0.0     | 100.00%    | <a href="#">KT165333.1</a> |
| <input type="checkbox"/>            | <a href="#">Tuber borchii voucher Tar136 18S ribosomal RNA gene, partial sequence; internal transcribed spacer 1, 5.8S ribosomal RNA gene, and internal transcribed spacer 2, complete sequence; and 28S ribosomal RNA gene, partial sequence</a>    | 953       | 953         | 95%         | 0.0     | 100.00%    | <a href="#">KT165330.1</a> |
| <input type="checkbox"/>            | <a href="#">Tuber borchii strain ATCC 96540 18S ribosomal RNA gene, partial sequence; internal transcribed spacer 1, 5.8S ribosomal RNA gene, and internal transcribed spacer 2, complete sequence; and 28S ribosomal RNA gene, partial sequence</a> | 953       | 953         | 95%         | 0.0     | 100.00%    | <a href="#">HQ026725.1</a> |

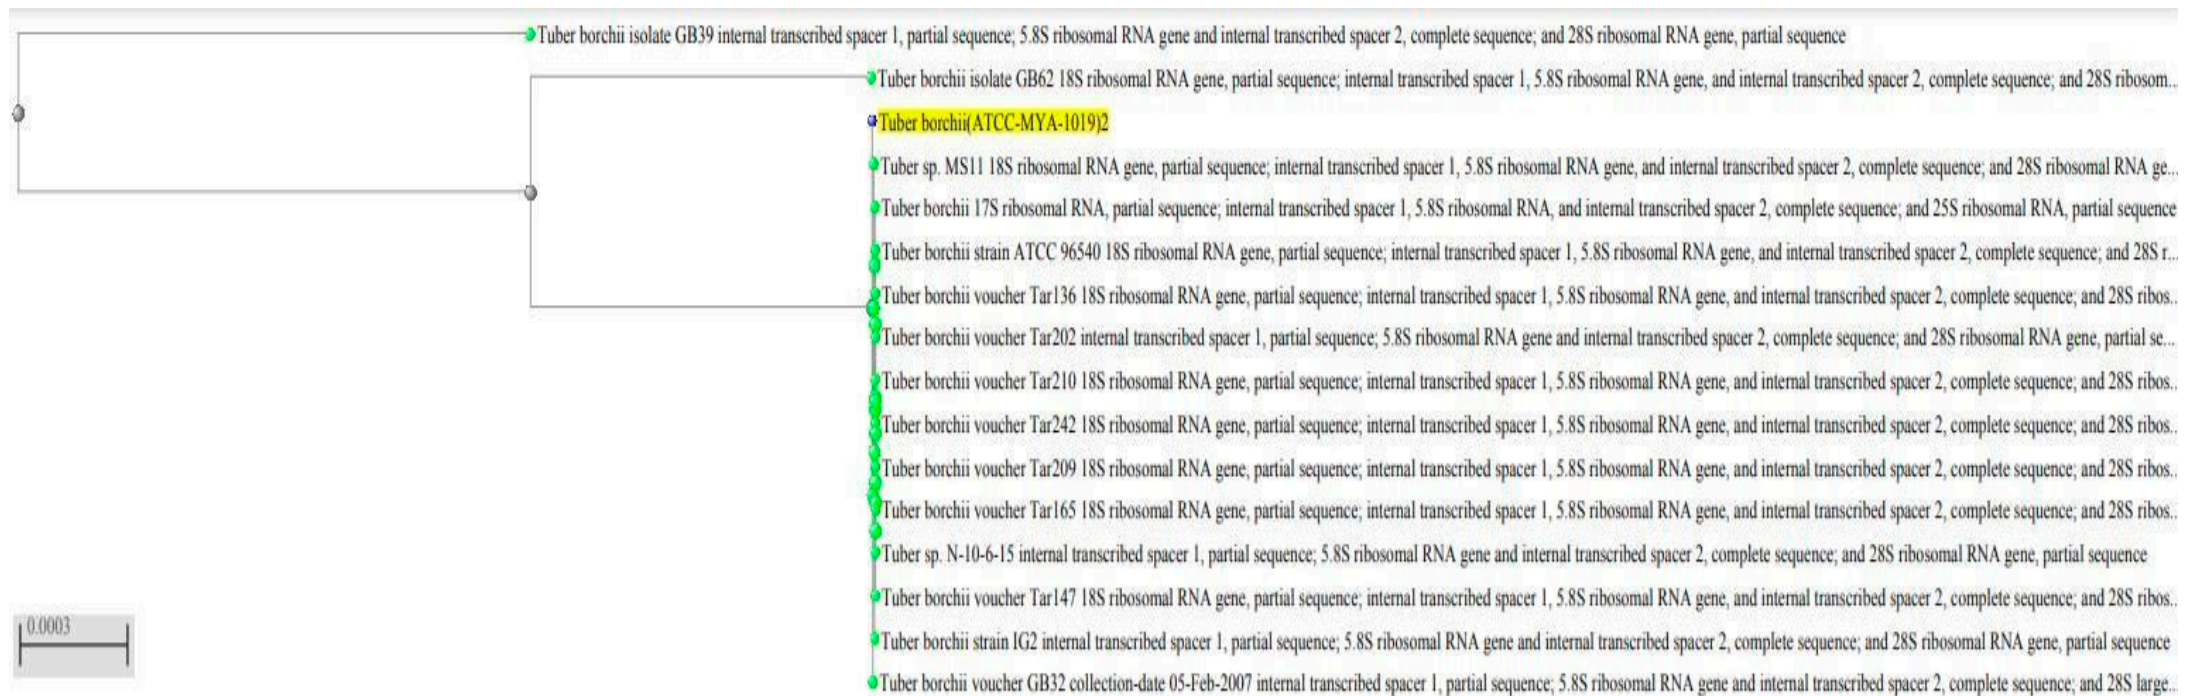



S/N G:92 A:86 T:43 C:54  
 KB.bcp  
 KB 1.4.1.8 Cap:28

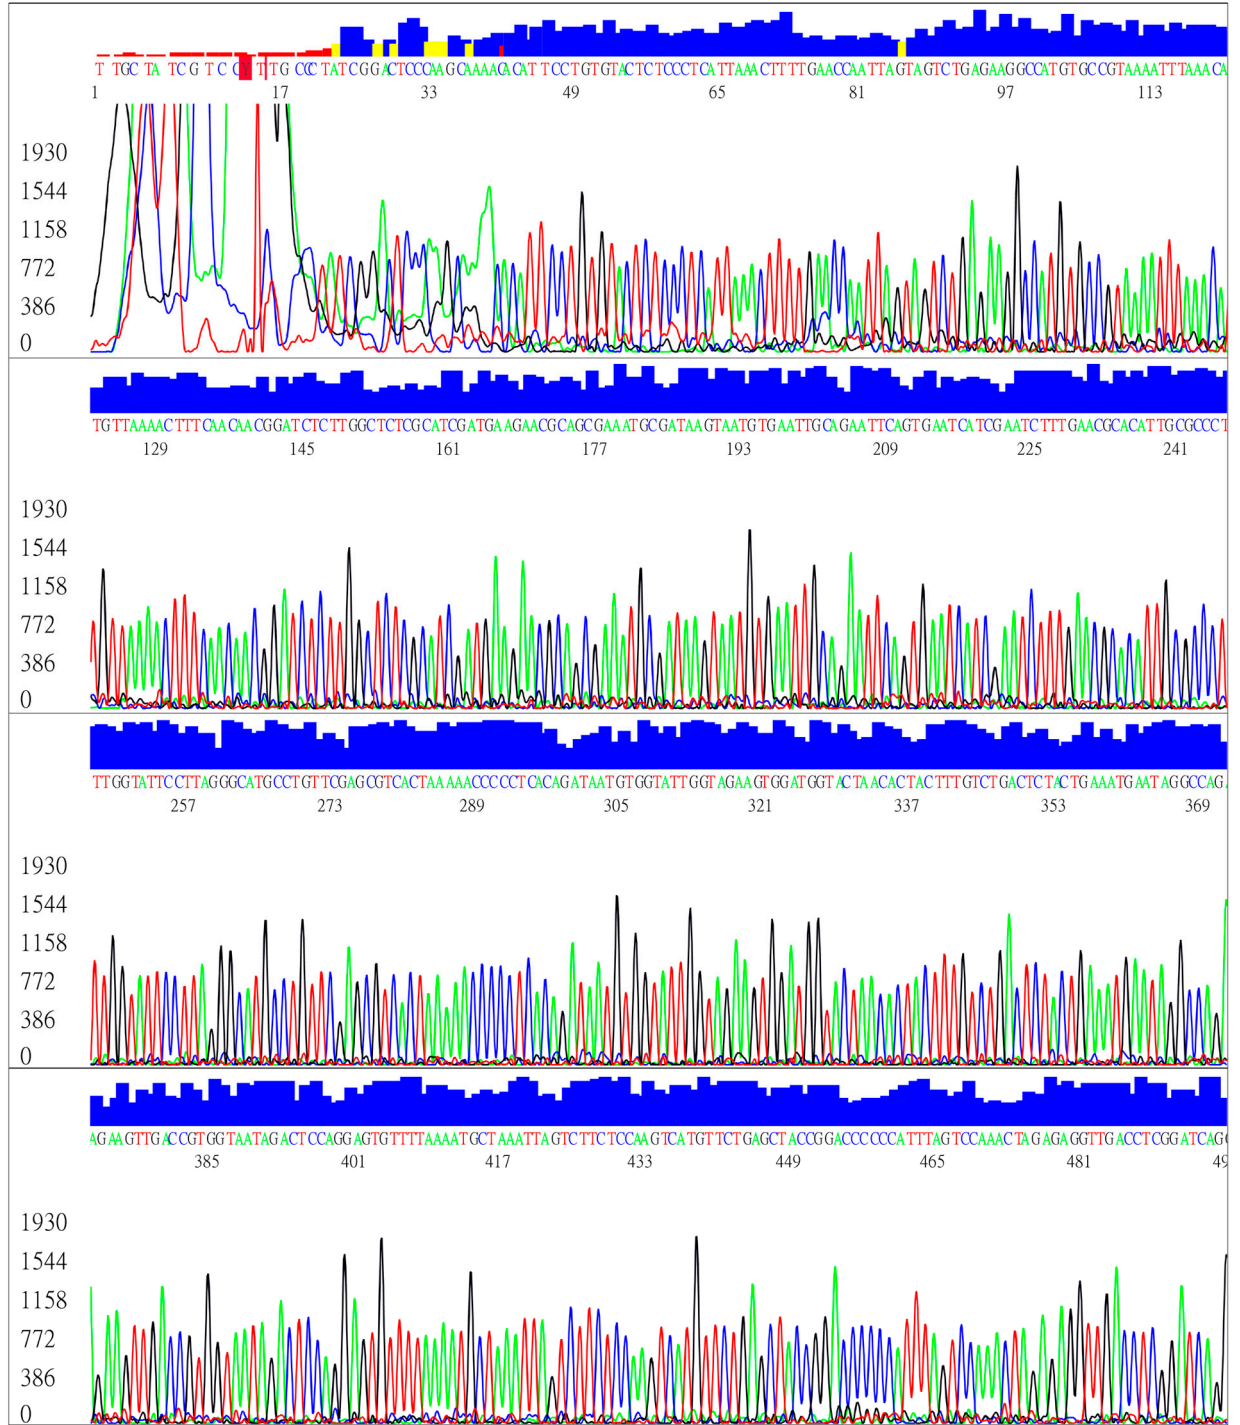

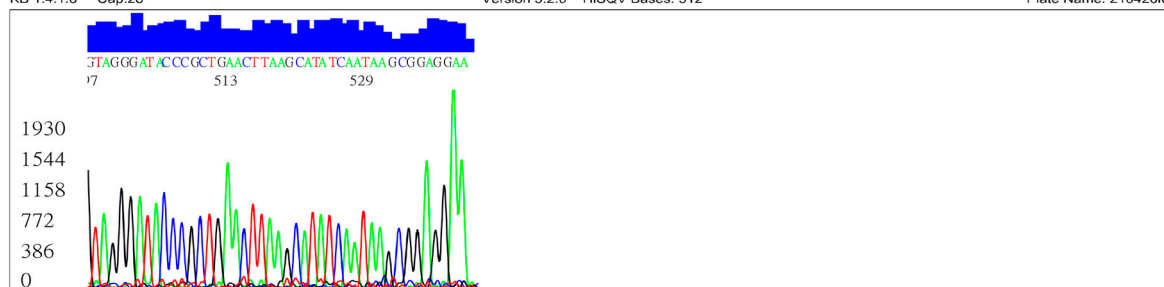

Supplement: s1 [file s1]
